# Supplementary material
Source: PubMed Central journal article supplement (PMC9159543)
Supplement: NIHMS1755644-supplement-Supplemental_Table_1.pdf [file NIHMS1755644-supplement-Supplemental_Table_1.pdf]

**Supplemental Online Table 1**

Examples of Basic, Generalizability, and Sample Specific Research Questions from Studies of Underrepresented Groups

| Underrepresented Group     | Type of Research Question                                                                                                                                                                                                                                                                                                                                               |                                                                                                                                                                                                                                                                                                                                                                                                                     |                                                                                                                                                                                                                                                                                                      |
|----------------------------|-------------------------------------------------------------------------------------------------------------------------------------------------------------------------------------------------------------------------------------------------------------------------------------------------------------------------------------------------------------------------|---------------------------------------------------------------------------------------------------------------------------------------------------------------------------------------------------------------------------------------------------------------------------------------------------------------------------------------------------------------------------------------------------------------------|------------------------------------------------------------------------------------------------------------------------------------------------------------------------------------------------------------------------------------------------------------------------------------------------------|
|                            | Basic                                                                                                                                                                                                                                                                                                                                                                   | Generalizability                                                                                                                                                                                                                                                                                                                                                                                                    | Population Specific                                                                                                                                                                                                                                                                                  |
| Low-Income                 | <p>“...the role of sleep in promoting positive relationship evaluations.” (Maranges &amp; McNulty, 2017, p. 118)</p>                                                                                                                                                                                                                                                    | <p>None were found</p>                                                                                                                                                                                                                                                                                                                                                                                              | <p>“...associations linking husbands’ and wives’ perceptions of economic pressure and stress related to cultural adaptation to their reports of marital satisfaction indirectly through their depressive symptoms and marital negativity.” (Helms et al., 2014, p. 79)</p>                           |
| Racial/Ethnic Minority     | <p>“First, what is the effect of childhood abuse on newlyweds’ initial levels of satisfaction and on changes in satisfaction over time? Second, is the effect of abuse history moderated by positive or negative characteristics of the partner?” (Nguyen et al., 2017, p. 83)</p>                                                                                      | <p>“...assessing the connections between both work demands and resources and marital satisfaction among African American couples. Most research on work–marriage linkages has focused on White samples. We know little about whether and how such processes operate in ethnic minority groups, and African American couples are an especially important focus for such research...” (Sun et al., 2017, p. 1029)</p> | <p>“...whether a racial/ethnic hierarchy exists in dating preferences among Asians...whether region of residence, political orientation, education, and age have a measurable impact on an Asian’s willingness to cross the color line when it comes to dating.” (Tsunokai et al., 2014, p. 797)</p> |
| Sexual and Gender Minority | <p>“...the role of interpersonal processes (i.e., aspects of the couple’s relationship quality, preparenthood), as well as child and adoption factors (i.e., child age at adoption and parents’ lack of preparation for the adoption, measured 3 months postadoptive placement) as predictors [of relationship dissolution].” (Goldberg &amp; Garcia, 2015, p. 396)</p> | <p>“We examined whether similarity, complementarity, accuracy, and positive illusions exist within the sex lives of same-sex romantic couples.” (De Jong &amp; Reis, 2015, p. 647)</p>                                                                                                                                                                                                                              | <p>“To what extent, and from which sources (from whom), do individuals in interracial and same-sex couples experience relationship stigma?” (Rosenthal &amp; Starks, 2015, p. 818)</p>                                                                                                               |

## References

- De Jong, D. C., & Reis, H. T. (2015). Sexual similarity, complementarity, accuracy, and overperception in same-sex couples. *Personal Relationships, 22*(4), 647–665.  
<https://doi.org/10.1111/pere.12101>
- Goldberg, A. E., & Garcia, R. (2015). Predictors of relationship dissolution in lesbian, gay, and heterosexual adoptive parents. *Journal of Family Psychology, 29*(3), 394–404.  
<https://doi.org/10.1037/fam0000095>
- Helms, H. M., Supple, A. J., Su, J., Rodriguez, Y., Cavanaugh, A. M., & Hengstebeck, N. D. (2014). Economic pressure, cultural adaptation stress, and marital quality among Mexican-origin couples. *Journal of Family Psychology, 28*(1), 77–87.  
<https://doi.org/10.1037/a0035738>
- Maranges, H. M., & McNulty, J. K. (2017). The rested relationship: Sleep benefits marital evaluations. *Journal of Family Psychology, 31*(1), 117–122.  
<https://doi.org/10.1037/fam0000225>
- Nguyen, T. P., Karney, B. R., & Bradbury, T. N. (2017). Childhood abuse and later marital outcomes: Do partner characteristics moderate the association? *Journal of Family Psychology, 31*(1), 82–92. <https://doi.org/10.1037/fam0000208>
- Rosenthal, L., & Starks, T. J. (2015). Relationship stigma and relationship outcomes in interracial and same-sex relationships: Examination of sources and buffers. *Journal of Family Psychology, 29*(6), 818–830. <https://doi.org/10.1037/fam0000116>
- Sun, X., McHale, S. M., Crouter, A. C., & Jones, D. E. (2017). Longitudinal links between work experiences and marital satisfaction in African American dual-earner couples. *Journal of Family Psychology, 31*(8), 1029–1039. <https://doi.org/10.1037/fam0000381>

Tsunokai, G. T., McGrath, A. R., & Kavanagh, J. K. (2014). Online dating preferences of Asian Americans. *Journal of Social and Personal Relationships*, 31(6), 796–814.

<https://doi.org/10.1177/0265407513505925>
